# Supplementary material
Source: PubMed Central journal article supplement (PMC7686300)
Supplement: NIHMS1636739-supplement-Supplementary_File_4.pdf [file NIHMS1636739-supplement-Supplementary_File_4.pdf]

# Genome-wide overview of pathways regulated by differentially expressed genes

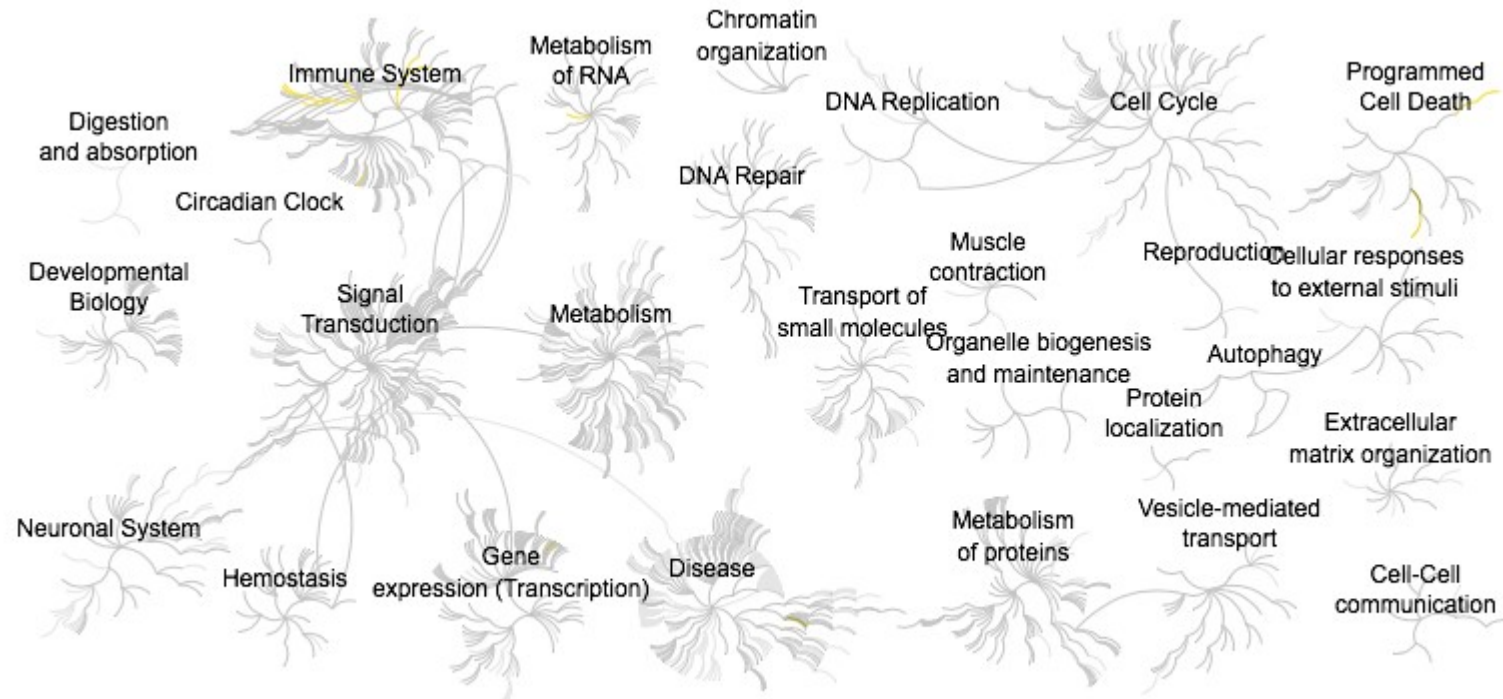

## 4. Most significant pathways

The following table shows the 25 most relevant pathways sorted by p-value.

| Pathway name                                                                      | Entities    |          |          |          | Reactions   |          |
|-----------------------------------------------------------------------------------|-------------|----------|----------|----------|-------------|----------|
|                                                                                   | found       | ratio    | p-value  | FDR*     | found       | ratio    |
| Antigen Presentation: Folding, assembly and peptide loading of class I MHC        | 76 / 102    | 0.007    | 1.11e-16 | 1.49e-14 | 15 / 16     | 0.001    |
| ER-Phagosome pathway                                                              | 81 / 165    | 0.012    | 1.11e-16 | 1.49e-14 | 9 / 10      | 8.19e-04 |
| Class I MHC mediated antigen processing & presentation                            | 102 / 465   | 0.033    | 1.11e-16 | 1.49e-14 | 40 / 48     | 0.004    |
| Interferon gamma signaling                                                        | 103 / 250   | 0.018    | 1.11e-16 | 1.49e-14 | 12 / 15     | 0.001    |
| Antigen processing-Cross presentation                                             | 83 / 187    | 0.013    | 1.11e-16 | 1.49e-14 | 18 / 23     | 0.002    |
| Endosomal/Vacuolar pathway                                                        | 73 / 82     | 0.006    | 1.11e-16 | 1.49e-14 | 3 / 4       | 3.28e-04 |
| Interferon alpha/beta signaling                                                   | 104 / 184   | 0.013    | 1.11e-16 | 1.49e-14 | 15 / 20     | 0.002    |
| Interferon Signaling                                                              | 127 / 392   | 0.028    | 1.11e-16 | 1.49e-14 | 44 / 66     | 0.005    |
| Cytokine Signaling in Immune system                                               | 189 / 1,245 | 0.088    | 1.11e-16 | 1.49e-14 | 263 / 699   | 0.057    |
| Immunoregulatory interactions between a Lymphoid and a non-Lymphoid cell          | 76 / 316    | 0.022    | 1.11e-16 | 1.49e-14 | 14 / 43     | 0.004    |
| Adaptive Immune System                                                            | 123 / 998   | 0.07     | 3.57e-10 | 4.36e-08 | 111 / 261   | 0.021    |
| Immune System                                                                     | 272 / 2,803 | 0.198    | 4.95e-10 | 5.54e-08 | 570 / 1,586 | 0.13     |
| TRAF6 mediated IRF7 activation                                                    | 15 / 43     | 0.003    | 5.07e-07 | 5.23e-05 | 6 / 11      | 9.01e-04 |
| DDX58/IFIH1-mediated induction of interferon-alpha/beta                           | 20 / 96     | 0.007    | 1.76e-05 | 0.002    | 16 / 46     | 0.004    |
| Insulin-like Growth Factor-2 mRNA Binding Proteins (IGF2BPs/IMPs/VICKZs) bind RNA | 7 / 13      | 9.17e-04 | 4.03e-05 | 0.004    | 2 / 3       | 2.46e-04 |
| Regulation of IFNA signaling                                                      | 9 / 28      | 0.002    | 1.73e-04 | 0.015    | 4 / 5       | 4.10e-04 |
| RUNX1 regulates expression of components of tight junctions                       | 5 / 8       | 5.65e-04 | 2.61e-04 | 0.021    | 6 / 6       | 4.92e-04 |
| RUNX1 regulates estrogen receptor mediated transcription                          | 5 / 10      | 7.06e-04 | 7.12e-04 | 0.051    | 7 / 8       | 6.55e-04 |
| Regulation of necroptotic cell death                                              | 7 / 21      | 0.001    | 7.24e-04 | 0.051    | 4 / 5       | 4.10e-04 |
| CASP8 activity is inhibited                                                       | 5 / 14      | 9.88e-04 | 0.003    | 0.205    | 2 / 3       | 2.46e-04 |
| RIPK1-mediated regulated necrosis                                                 | 7 / 28      | 0.002    | 0.004    | 0.22     | 5 / 13      | 0.001    |
| Regulated Necrosis                                                                | 7 / 28      | 0.002    | 0.004    | 0.22     | 5 / 13      | 0.001    |
| Regulation by c-FLIP                                                              | 4 / 11      | 7.76e-04 | 0.007    | 0.415    | 4 / 4       | 3.28e-04 |
| Dimerization of procaspase-8                                                      | 4 / 11      | 7.76e-04 | 0.007    | 0.415    | 3 / 3       | 2.46e-04 |

| Pathway name                          | Entities |       |         |       | Reactions |       |
|---------------------------------------|----------|-------|---------|-------|-----------|-------|
|                                       | found    | ratio | p-value | FDR*  | found     | ratio |
| <a href="#">Programmed Cell Death</a> | 23 / 195 | 0.014 | 0.01    | 0.524 | 42 / 152  | 0.012 |

\* False Discovery Rate
