# Supplementary material
Source: PubMed Central journal article supplement (PMC7686300)
Supplement: NIHMS1636739-supplement-Supplementary_File_5.pdf [file NIHMS1636739-supplement-Supplementary_File_5.pdf]

## List of predicted miR-142-3p binding sites on human gene targets

Version: RNAhybrid 2.2  
Command line: /vol/bioapps/bin/RNAhybrid.bin -t  
/var/bibiserv2/anonymous/rnahybrid/28/22/57/bibiserv2\_2019-10-  
28\_225710\_oEm7S/rnahybrid\_input\_target\_rna\_sequences.file -b 20 -q  
/var/bibiserv2/anonymous/rnahybrid/28/22/57/bibiserv2\_2019-10-  
28\_225710\_oEm7S/rnahybrid\_input\_mirna\_sequences.file -n 23 -s 3utr\_human -m  
1147

searching

dataset: 1

mde of hsa-miR-142-3p: -43.499996

Individual hits

-----  
dataset: 1

target:

ENSG00000125753|ENSG00000125753.14|ENST00000586014|ENST00000586014.5|VASP

length: 1147

miRNA : hsa-miR-142-3p

length: 23

mfe: -21.0 kcal/mol

p-value: 1.000000e+00

position 350

target 5' G CUG G 3'

UCCA GGAG AGGAAGCG

AGGU UUUC UCCUUUGU

miRNA 3' A A GAUGU 5'

-----  
dataset: 1

target:

ENSG00000125753|ENSG00000125753.14|ENST00000586014|ENST00000586014.5|VASP

length: 1147

miRNA : hsa-miR-142-3p

length: 23

mfe: -20.7 kcal/mol

p-value: 1.000000e+00

position 14

target 5' G U A 3'

GAGGUGGGGGAC C

UUUCAUCCUUUG G

miRNA 3' AGGUA U AUGU 5'

-----  
dataset: 1

target:

ENSG00000125753|ENSG00000125753.14|ENST00000586014|ENST00000586014.5|VASP

length: 1147

miRNA : hsa-miR-142-3p  
length: 23

mfe: -20.5 kcal/mol  
p-value: 1.000000e+00

position 44  
target 5' G CUGGCCCG A GC A 3'  
CCAUG GAG AGGAAA CAC GCA  
GGUAU UUC UCCUUU GUG UGU  
miRNA 3' A A A 5'

dataset: 1  
target:  
ENSG00000125753|ENSG00000125753.14|ENST00000586014|ENST00000586014.5|VASP  
length: 1147  
miRNA : hsa-miR-142-3p  
length: 23

mfe: -19.7 kcal/mol  
p-value: 1.000000e+00

position 301  
target 5' G A G 3'  
GUGAAG AGGA AUUGCA  
UAUUUC UCCU UGAUGU  
miRNA 3' AGG A UUG 5'

dataset: 1  
target:  
ENSG00000125753|ENSG00000125753.14|ENST00000586014|ENST00000586014.5|VASP  
length: 1147  
miRNA : hsa-miR-142-3p  
length: 23

mfe: -19.5 kcal/mol  
p-value: 1.000000e+00

position 141  
target 5' C AAUCUGUGC C G A 3'  
CCA GAGUG GGAGAC CUG G  
GGU UUCAU CCUUUG GAU U  
miRNA 3' A AU U G 5'

dataset: 1  
target:  
ENSG00000125753|ENSG00000125753.14|ENST00000586014|ENST00000586014.5|VASP  
length: 1147  
miRNA : hsa-miR-142-3p  
length: 23

mfe: -19.4 kcal/mol  
p-value: 1.000000e+00

position 975

```
target 5' U                AGA   U 3'  
          UCUAUG      AGGAAAUA   UGC  
          AGGUAU      UCCUUUGU   AUG  
miRNA 3'          UUCA                G   U 5'
```

---

dataset: 1

target:

ENSG00000125753|ENSG00000125753.14|ENST00000586014|ENST00000586014.5|VASP

length: 1147

miRNA : hsa-miR-142-3p

length: 23

mfe: -19.0 kcal/mol

p-value: 1.000000e+00

position 821

```
target 5' U   G   A   UGUGGGAGUUUUUA   G 3'  
          UU AUA   A   UGGGA   AAUGCUAUA  
          AG UAUUU AUCCU   UUGUGAUGU  
miRNA 3'   G   C   5'
```

---

dataset: 1

target:

ENSG00000125753|ENSG00000125753.14|ENST00000586014|ENST00000586014.5|VASP

length: 1147

miRNA : hsa-miR-142-3p

length: 23

mfe: -18.4 kcal/mol

p-value: 1.000000e+00

position 522

```
target 5' C   AG   U   CUU C   U 3'  
          UCCA GGGGUG GG   C CUGC  
          AGGU UUUCAU CC   G GAUG  
miRNA 3'   A   UUU U   U 5'
```

---

dataset: 1

target:

ENSG00000125753|ENSG00000125753.14|ENST00000586014|ENST00000586014.5|VASP

length: 1147

miRNA : hsa-miR-142-3p

length: 23

mfe: -18.1 kcal/mol

p-value: 1.000000e+00

position 664  
target 5' C CAG G G A 3'  
CCA GAAG GGAAG A  
GGU UUUC UCCUUU U  
miRNA 3' A A A G GAUGU 5'

---

dataset: 1  
target:  
ENSG00000125753|ENSG00000125753.14|ENST00000586014|ENST00000586014.5|VASP  
length: 1147  
miRNA : hsa-miR-142-3p  
length: 23

mfe: -17.7 kcal/mol  
p-value: 1.000000e+00

position 322  
target 5' A AG U A 3'  
GUGAA AGGAAA CAUUG  
UAUUU UCCUUU GUGAU  
miRNA 3' AGG CA GU 5'

---

dataset: 1  
target:  
ENSG00000125753|ENSG00000125753.14|ENST00000586014|ENST00000586014.5|VASP  
length: 1147  
miRNA : hsa-miR-142-3p  
length: 23

mfe: -17.6 kcal/mol  
p-value: 1.000000e+00

position 872  
target 5' C U CA U 3'  
CCAU UGGGG GCUAU  
GGUA AUCCU UGAUG  
miRNA 3' A UUUC UUG U 5'

---

dataset: 1  
target:  
ENSG00000125753|ENSG00000125753.14|ENST00000586014|ENST00000586014.5|VASP  
length: 1147  
miRNA : hsa-miR-142-3p  
length: 23

mfe: -17.5 kcal/mol  
p-value: 1.000000e+00

position 1100  
target 5' A GGG U 3'  
GAAG AGGAAAC

miRNA 3' AGGUA A UGUAUGU 5'  
UUUC UCCUUUG

---

dataset: 1  
target:  
ENSG00000125753|ENSG00000125753.14|ENST00000586014|ENST00000586014.5|VASP  
length: 1147  
miRNA : hsa-miR-142-3p  
length: 23  
  
mfe: -17.0 kcal/mol  
p-value: 1.000000e+00

position 635  
target 5' G CUCUGCUG U C 3'  
UCC GGGG GCAC  
AGG UCCU UGUG  
miRNA 3' UAUUUCA U AUGU 5'

---

dataset: 1  
target:  
ENSG00000125753|ENSG00000125753.14|ENST00000586014|ENST00000586014.5|VASP  
length: 1147  
miRNA : hsa-miR-142-3p  
length: 23  
  
mfe: -16.5 kcal/mol  
p-value: 1.000000e+00

position 682  
target 5' N A UUU A 3'  
AAGG GGGAA CAC  
UUUC UCCUU GUG  
miRNA 3' AGGUA A U AUGU 5'

---

dataset: 1  
target:  
ENSG00000125753|ENSG00000125753.14|ENST00000586014|ENST00000586014.5|VASP  
length: 1147  
miRNA : hsa-miR-142-3p  
length: 23  
  
mfe: -16.5 kcal/mol  
p-value: 1.000000e+00

position 890  
target 5' U GG GUCUCACCGG G G 3'  
UAAGG AGGGGAU GCUG G  
AUUUC UCCUUUG UGAU U  
miRNA 3' AGGU A G 5'

---

dataset: 1  
target:  
ENSG00000125753|ENSG00000125753.14|ENST00000586014|ENST00000586014.5|VASP  
length: 1147  
miRNA : hsa-miR-142-3p  
length: 23

mfe: -16.5 kcal/mol  
p-value: 1.000000e+00

position 1069  
target 5' C UU A 3'  
CC GG AGGAAUA  
GG UC UCCUUUGU  
miRNA 3' A UAUU A GAUGU 5'

---

dataset: 1  
target:  
ENSG00000125753|ENSG00000125753.14|ENST00000586014|ENST00000586014.5|VASP  
length: 1147  
miRNA : hsa-miR-142-3p  
length: 23

mfe: -16.1 kcal/mol  
p-value: 1.000000e+00

position 250  
target 5' C GUGAUUACUC G 3'  
UCCA GGAC CUACA  
AGGU UUUG GAUGU  
miRNA 3' AUUUCAUCC U 5'

---

dataset: 1  
target:  
ENSG00000125753|ENSG00000125753.14|ENST00000586014|ENST00000586014.5|VASP  
length: 1147  
miRNA : hsa-miR-142-3p  
length: 23

mfe: -15.6 kcal/mol  
p-value: 1.000000e+00

position 458  
target 5' A UG U CU G C 3'  
CU GAA UGG GAA ACUACA  
GG UUU AUC UUU UGAUGU  
miRNA 3' A UA C C G 5'

---

dataset: 1

target:  
ENSG00000125753|ENSG00000125753.14|ENST00000586014|ENST00000586014.5|VASP  
length: 1147  
miRNA : hsa-miR-142-3p  
length: 23

mfe: -15.3 kcal/mol  
p-value: 1.000000e+00

position 190  
target 5' G AGGA CGUCUUCUUC U CCACUCCGAGACCC C C 3'  
CCA UGAAGU GG GA AAC CUGCA  
GGU AUUUCA UC CU UUG GAUGU  
miRNA 3' A U 5'

---

dataset: 1  
target:  
ENSG00000125753|ENSG00000125753.14|ENST00000586014|ENST00000586014.5|VASP  
length: 1147  
miRNA : hsa-miR-142-3p  
length: 23

mfe: -14.9 kcal/mol  
p-value: 1.000000e+00

position 107  
target 5' G AUC C G 3'  
CCA AGG AGGAG CA  
GGU UUC UCCUU GU  
miRNA 3' A AU A U GAUGU 5'

---

Version: RNAhybrid 2.2

Command line:/vol/bioapps/bin/RNAhybrid.bin -s 3utr\_human -q  
/var/bibiserv2/anonymous/rnahybrid/28/22/54/bibiserv2\_2019-10-  
28\_225411\_F8wHH/rnahybrid\_input\_mirna\_sequences.file -b 20 -n 23 -t  
/var/bibiserv2/anonymous/rnahybrid/28/22/54/bibiserv2\_2019-10-  
28\_225411\_F8wHH/rnahybrid\_input\_target\_rna\_sequences\_.file -m 3247  
searching

dataset: 1

mde of hsa-miR-142-3p: -43.499996

Individual hits

-----  
dataset: 1

target:

ENSG00000169756|ENSG00000169756.16|ENST00000393310|ENST00000393310.5|LIMS1

length: 3247

miRNA : hsa-miR-142-3p

length: 23

mfe: -25.0 kcal/mol

p-value: 1.000000e+00

position 2659

```
target 5' C   GCUACUCGGGAGGC           GA UG   UG A 3'  
          CCA           UGAGGUAGGA A GCU A  
          GGU           AUUUCAUCCU U UGA U  
miRNA  3' A                               UG   UG   5'
```

-----  
dataset: 1

target:

ENSG00000169756|ENSG00000169756.16|ENST00000393310|ENST00000393310.5|LIMS1

length: 3247

miRNA : hsa-miR-142-3p

length: 23

mfe: -22.3 kcal/mol

p-value: 1.000000e+00

position 2174

```
target 5' G   GGCGU       C       C       G 3'  
          CCG       GGUGG GGGCAC UGCA  
          GGU       UCAUC UUUGUG AUGU  
miRNA  3' A   AUU       C           5'
```

-----  
dataset: 1

target:

ENSG00000169756|ENSG00000169756.16|ENST00000393310|ENST00000393310.5|LIMS1

length: 3247

miRNA : hsa-miR-142-3p

length: 23

mfe: -22.0 kcal/mol

p-value: 1.000000e+00



```
position 1192
target 5' A          GGUAUAAAU      C   3'
          CUGU AAGUAGGA      GACACU
          GGUA UUCAUCCU      UUGUGA
miRNA 3' A      U                               UGU 5'
```

---

```
dataset: 1
target:
ENSG00000169756|ENSG00000169756.16|ENST00000393310|ENST00000393310.5|LIMS1
length: 3247
miRNA : hsa-miR-142-3p
length: 23
```

```
mfe: -21.5 kcal/mol
p-value: 1.000000e+00
```

```
position 2105
target 5' A      C      C      CAAGACCAUCCUG      C 3'
          UCA GAGGU AGGAGAU      GCUAC
          GGU UUUCA UCCUUUG      UGAUG
miRNA 3' A      A                               U 5'
```

---

```
dataset: 1
target:
ENSG00000169756|ENSG00000169756.16|ENST00000393310|ENST00000393310.5|LIMS1
length: 3247
miRNA : hsa-miR-142-3p
length: 23
```

```
mfe: -21.5 kcal/mol
p-value: 1.000000e+00
```

```
position 2550
target 5' A      C      C      CCAG      C 3'
          UCA GAGGU AGGAGAU      ACUAU
          GGU UUUCA UCCUUUG      UGAUG
miRNA 3' A      A                               U 5'
```

---

```
dataset: 1
target:
ENSG00000169756|ENSG00000169756.16|ENST00000393310|ENST00000393310.5|LIMS1
length: 3247
miRNA : hsa-miR-142-3p
length: 23
```

mfe: -20.7 kcal/mol  
p-value: 1.000000e+00

position 2743  
target 5' C GCC C GA A 3'  
UCCA UGGG GACA GCA  
AGGU AUCC UUGU UGU  
miRNA 3' AUUUC U GA 5'

---

dataset: 1  
target:  
ENSG00000169756|ENSG00000169756.16|ENST00000393310|ENST00000393310.5|LIMS1  
length: 3247  
miRNA : hsa-miR-142-3p  
length: 23

mfe: -20.3 kcal/mol  
p-value: 1.000000e+00

position 701  
target 5' A UUU ACUU A 3'  
CCA GGUA GGAAUUAU UACA  
GGU UCAU CCUUUGUG AUGU  
miRNA 3' A AUU 5'

---

dataset: 1  
target:  
ENSG00000169756|ENSG00000169756.16|ENST00000393310|ENST00000393310.5|LIMS1  
length: 3247  
miRNA : hsa-miR-142-3p  
length: 23

mfe: -20.3 kcal/mol  
p-value: 1.000000e+00

position 2286  
target 5' C GCC C GA A 3'  
UCCA UGGG AACA GCA  
AGGU AUCC UUGU UGU  
miRNA 3' AUUUC U GA 5'

---

dataset: 1  
target:  
ENSG00000169756|ENSG00000169756.16|ENST00000393310|ENST00000393310.5|LIMS1  
length: 3247  
miRNA : hsa-miR-142-3p  
length: 23

mfe: -20.3 kcal/mol  
p-value: 1.000000e+00

position 2631  
target 5' G GGCGU C U 3'  
CCA GGUGG GGGCGCU  
GGU UCAUC UUUGUGA  
miRNA 3' A AUU C UGU 5'

---

dataset: 1  
target:  
ENSG00000169756|ENSG00000169756.16|ENST00000393310|ENST00000393310.5|LIMS1  
length: 3247  
miRNA : hsa-miR-142-3p  
length: 23

mfe: -20.1 kcal/mol  
p-value: 1.000000e+00

position 1796  
target 5' G UA C AGA G 3'  
CUAUGAA UAGG AACAC ACA  
GGUAUUU AUCC UUGUG UGU  
miRNA 3' A C U A 5'

---

dataset: 1  
target:  
ENSG00000169756|ENSG00000169756.16|ENST00000393310|ENST00000393310.5|LIMS1  
length: 3247  
miRNA : hsa-miR-142-3p  
length: 23

mfe: -20.1 kcal/mol  
p-value: 1.000000e+00

position 1295  
target 5' A UUC C C 3'  
UCC UGAAGU AGGA CACU  
AGG AUUUCA UCCU GUGA  
miRNA 3' U UU UGU 5'

---

dataset: 1  
target:  
ENSG00000169756|ENSG00000169756.16|ENST00000393310|ENST00000393310.5|LIMS1  
length: 3247  
miRNA : hsa-miR-142-3p  
length: 23

mfe: -20.1 kcal/mol  
p-value: 1.000000e+00

position 386  
target 5' U AC CU UG G G 3'  
UCCA UG GU GGGAAG AC ACA

miRNA 3' AGGU AU CA UCCUUU UG UGU  
UU G A 5'

---

dataset: 1  
target:  
ENSG00000169756|ENSG00000169756.16|ENST00000393310|ENST00000393310.5|LIMS1  
length: 3247  
miRNA : hsa-miR-142-3p  
length: 23

mfe: -19.4 kcal/mol  
p-value: 1.000000e+00

position 2699  
target 5' C GC G 3'  
CCA GGAG GG AGC UUGCA  
GGU UUUC CC UUG GAUGU  
miRNA 3' A A AU U U 5'

---

dataset: 1  
target:  
ENSG00000169756|ENSG00000169756.16|ENST00000393310|ENST00000393310.5|LIMS1  
length: 3247  
miRNA : hsa-miR-142-3p  
length: 23

mfe: -18.8 kcal/mol  
p-value: 1.000000e+00

position 2202  
target 5' C GCUACUC UGAG G 3'  
CCA GGGAGGC GCA  
GGU UCCUUUG UGU  
miRNA 3' A AUUUCA UGA 5'

---

dataset: 1  
target:  
ENSG00000169756|ENSG00000169756.16|ENST00000393310|ENST00000393310.5|LIMS1  
length: 3247  
miRNA : hsa-miR-142-3p  
length: 23

mfe: -18.2 kcal/mol  
p-value: 1.000000e+00

position 1402  
target 5' G AG ACUUCU AA UG G 3'  
CCA AGAG UAGGGA AUAUU G  
GGU UUUC AUCCUU UGUGA U  
miRNA 3' A A UG 5'

---

dataset: 1  
target:  
ENSG00000169756|ENSG00000169756.16|ENST00000393310|ENST00000393310.5|LIMS1  
length: 3247  
miRNA : hsa-miR-142-3p  
length: 23

mfe: -18.1 kcal/mol  
p-value: 1.000000e+00

position 3148  
target 5' C AU C U 3'  
UCA GG AGG GAUACUAUA  
GGU UC UCC UUGUGAUGU  
miRNA 3' A AUU A U 5'

---

dataset: 1  
target:  
ENSG00000169756|ENSG00000169756.16|ENST00000393310|ENST00000393310.5|LIMS1  
length: 3247  
miRNA : hsa-miR-142-3p  
length: 23

mfe: -17.9 kcal/mol  
p-value: 1.000000e+00

position 2244  
target 5' C GA U 3'  
GGGAGGCA GC  
UCCUUUGU UG  
miRNA 3' AGGUAUUUCA GA U 5'

---

dataset: 1  
target:  
ENSG00000169756|ENSG00000169756.16|ENST00000393310|ENST00000393310.5|LIMS1  
length: 3247  
miRNA : hsa-miR-142-3p  
length: 23

mfe: -17.9 kcal/mol  
p-value: 1.000000e+00

position 2970  
target 5' A UC ACA UG G A 3'  
CAUAA AGGA A G UACA  
GUAUU UCCU U U AUGU  
miRNA 3' AG UCA UG G 5'

---

dataset: 1

target:  
ENSG00000169756|ENSG00000169756.16|ENST00000393310|ENST00000393310.5|LIMS1  
length: 3247  
miRNA : hsa-miR-142-3p  
length: 23

mfe: -17.7 kcal/mol  
p-value: 1.000000e+00

position 3016  
target 5' A           CCUUAUU           C 3'  
          UUCA AAG           AGCACUGCA  
          AGGU UUC           UUGUGAUGU  
miRNA 3'        AU   AUCCU           5'

---

dataset: 1  
target:  
ENSG00000169756|ENSG00000169756.16|ENST00000393310|ENST00000393310.5|LIMS1  
length: 3247  
miRNA : hsa-miR-142-3p  
length: 23

mfe: -17.6 kcal/mol  
p-value: 1.000000e+00

position 2520  
target 5' C   GCACUU           GAGGGGG   G 3'  
          CCA       UGGGAGGC C       GCG  
          GGU       AUCCUUUG G       UGU  
miRNA 3' A   AUUUC           U A           5'

Version: RNAhybrid 2.2  
Command line:/vol/bioapps/bin/RNAhybrid.bin -b 20 -t  
/var/bibiserv2/anonymous/rnahybrid/12/02/19/bibiserv2\_2019-09-  
12\_021949\_K5Yfz/rnahybrid\_input\_target\_rna\_sequences\_.file -s 3utr\_human -n  
23 -q /var/bibiserv2/anonymous/rnahybrid/12/02/19/bibiserv2\_2019-09-  
12\_021949\_K5Yfz/rnahybrid\_input\_mirna\_sequences.file -m 1991  
searching  
dataset: 1  
mde of hsa-miR-142-3p: -43.499996  
Individual hits

---

dataset: 1  
target:  
ENSG00000035403|ENSG00000035403.17|ENST00000211998|ENST00000211998.9|74118170  
|74120160|VCL  
length: 1991  
miRNA : hsa-miR-142-3p  
length: 23  
  
mfe: -24.4 kcal/mol  
p-value: 1.000000e+00

position 1757  
target 5' U GU UU G 3'  
UCCA GGU GAGACACUG  
AGGU UCA CUUUGUGAU  
miRNA 3' AUU UC GU 5'

---

dataset: 1  
target:  
ENSG00000035403|ENSG00000035403.17|ENST00000211998|ENST00000211998.9|74118170  
|74120160|VCL  
length: 1991  
miRNA : hsa-miR-142-3p  
length: 23  
  
mfe: -23.6 kcal/mol  
p-value: 1.000000e+00

position 1199  
target 5' U GUGCUGC AUGAAUCAA U 3'  
UCUA UGAAG UGGGAAAUACUAC  
AGGU AUUUC AUCCUUUGUGAUG  
miRNA 3' U 5'

---

dataset: 1  
target:  
ENSG00000035403|ENSG00000035403.17|ENST00000211998|ENST00000211998.9|74118170  
|74120160|VCL  
length: 1991  
miRNA : hsa-miR-142-3p  
length: 23

mfe: -21.3 kcal/mol  
p-value: 1.000000e+00

position 937  
target 5' G       UUU    CU                   U 3'  
          UUCAU   GAG    GAAAUGCUGCA  
          AGGUA   UUC    CUUUGUGAUGU  
miRNA  3'        U        AUC                   5'

---

dataset: 1  
target:  
ENSG00000035403|ENSG00000035403.17|ENST00000211998|ENST00000211998.9|74118170  
|74120160|VCL  
length: 1991  
miRNA : hsa-miR-142-3p  
length: 23

mfe: -20.4 kcal/mol  
p-value: 1.000000e+00

position 334  
target 5' U    C                                   U    3'  
          UCC            UAGGGGACACU  
          AGG            AUCCUUUGUGA  
miRNA  3'        UAUUUC                    UGU 5'

---

dataset: 1  
target:  
ENSG00000035403|ENSG00000035403.17|ENST00000211998|ENST00000211998.9|74118170  
|74120160|VCL  
length: 1991  
miRNA : hsa-miR-142-3p  
length: 23

mfe: -19.1 kcal/mol  
p-value: 1.000000e+00

position 294  
target 5' A                                           G  3'  
          UCCA    AGU    GAACACUA  
          AGGU    UCA    UUUGUGAU  
miRNA  3'        AUU    UCC                    GU 5'

---



dataset: 1  
target:  
ENSG00000035403|ENSG00000035403.17|ENST00000211998|ENST00000211998.9|74118170  
|74120160|VCL  
length: 1991  
miRNA : hsa-miR-142-3p  
length: 23

mfe: -18.9 kcal/mol  
p-value: 1.000000e+00

position 869  
target 5' C CUU CACUGCCUGCAG U UG U 3'  
UCCAUG AGU AGG C UGC  
AGGUAU UCA UCC G AUG  
miRNA 3' U UUU UG U 5'

---

dataset: 1  
target:  
ENSG00000035403|ENSG00000035403.17|ENST00000211998|ENST00000211998.9|74118170  
|74120160|VCL  
length: 1991  
miRNA : hsa-miR-142-3p  
length: 23

mfe: -18.8 kcal/mol  
p-value: 1.000000e+00

position 1450  
target 5' A GAU AA GUAAG C C 3'  
CCA GAGU AGGA AAC UUGC  
GGU UUCA UCCU UUG GAUG  
miRNA 3' A AU U U 5'

---

dataset: 1  
target:  
ENSG00000035403|ENSG00000035403.17|ENST00000211998|ENST00000211998.9|74118170  
|74120160|VCL  
length: 1991  
miRNA : hsa-miR-142-3p  
length: 23

mfe: -18.7 kcal/mol  
p-value: 1.000000e+00

position 1806  
target 5' C A UC CUC A 3'  
UCC AUA AGUG GAGACAC  
AGG UAU UCAU CUUUGUG  
miRNA 3' U C AUGU 5'

---

dataset: 1  
target:  
ENSG00000035403|ENSG00000035403.17|ENST00000211998|ENST00000211998.9|74118170  
|74120160|VCL  
length: 1991  
miRNA : hsa-miR-142-3p  
length: 23

mfe: -18.3 kcal/mol  
p-value: 1.000000e+00

position 561  
target 5' C            CCCCAGCAUUAU    GG            G    3'  
          UCUGUGGAG                    GG    GC    CUG  
          AGGUUUUUC                    CC    UG    GAU  
miRNA  3'            AU                    UU    U        GU 5'

---

dataset: 1  
target:  
ENSG00000035403|ENSG00000035403.17|ENST00000211998|ENST00000211998.9|74118170  
|74120160|VCL  
length: 1991  
miRNA : hsa-miR-142-3p  
length: 23

mfe: -18.2 kcal/mol  
p-value: 1.000000e+00

position 758  
target 5' G            CCAUCCCAU    C            U    3'  
          CCA    AGGUAG                    GAA    ACACUG  
          GGU    UUCAUC                    CUU    UGUGAU  
miRNA  3' A        AU                                    GU 5'

---

dataset: 1  
target:  
ENSG00000035403|ENSG00000035403.17|ENST00000211998|ENST00000211998.9|74118170  
|74120160|VCL  
length: 1991  
miRNA : hsa-miR-142-3p  
length: 23

mfe: -18.0 kcal/mol  
p-value: 1.000000e+00

position 74  
target 5' C            UGCU            U            3'  
          CCA    GAGU            GGGAGC  
          GGU    UUCA            CCUUUG  
miRNA  3' A        AU        U                    UGAUGU 5'

---

dataset: 1  
target:  
ENSG00000035403|ENSG00000035403.17|ENST00000211998|ENST00000211998.9|74118170  
|74120160|VCL  
length: 1991  
miRNA : hsa-miR-142-3p  
length: 23

mfe: -17.6 kcal/mol  
p-value: 1.000000e+00

position 1658  
target 5' G UU U U G 3'  
CC UAAAGUA GAA CUAU  
GG AUUUCAU CUU GAUG  
miRNA 3' A U C UGU U 5'

---

dataset: 1  
target:  
ENSG00000035403|ENSG00000035403.17|ENST00000211998|ENST00000211998.9|74118170  
|74120160|VCL  
length: 1991  
miRNA : hsa-miR-142-3p  
length: 23

mfe: -17.5 kcal/mol  
p-value: 1.000000e+00

position 36  
target 5' A A A AUGAU A 3'  
CUA AAAG AGGAAA CUG  
GGU UUUC UCCUUU GAU  
miRNA 3' A A A GU GU 5'

---

dataset: 1  
target:  
ENSG00000035403|ENSG00000035403.17|ENST00000211998|ENST00000211998.9|74118170  
|74120160|VCL  
length: 1991  
miRNA : hsa-miR-142-3p  
length: 23

mfe: -17.3 kcal/mol  
p-value: 1.000000e+00

position 518  
target 5' G UUUUCA A CUUU U G 3'  
UCC GAAGUG G GC GCUACA  
AGG UUUCAU C UG UGAUGU  
miRNA 3' UA C UU 5'

---

dataset: 1  
target:  
ENSG00000035403|ENSG00000035403.17|ENST00000211998|ENST00000211998.9|74118170  
|74120160|VCL  
length: 1991  
miRNA : hsa-miR-142-3p  
length: 23

mfe: -17.2 kcal/mol  
p-value: 1.000000e+00

position 118  
target 5' A G GAAU GG CUU A 3'  
UCA AAAG GG GC CU CA  
GGU UUUC CC UG GA GU  
miRNA 3' A A AU UU U U 5'

---

dataset: 1  
target:  
ENSG00000035403|ENSG00000035403.17|ENST00000211998|ENST00000211998.9|74118170  
|74120160|VCL  
length: 1991  
miRNA : hsa-miR-142-3p  
length: 23

mfe: -17.1 kcal/mol  
p-value: 1.000000e+00

position 1904  
target 5' A C UUUGUUAUA A 3'  
UUUUAUAG UAGGA UGCA  
AGGUUUU AUCCU AUGU  
miRNA 3' C UUGUG 5'

---

dataset: 1  
target:  
ENSG00000035403|ENSG00000035403.17|ENST00000211998|ENST00000211998.9|74118170  
|74120160|VCL  
length: 1991  
miRNA : hsa-miR-142-3p  
length: 23

mfe: -16.4 kcal/mol  
p-value: 1.000000e+00

position 1093  
target 5' G UAAG U 3'  
UCC AAAG AGGAG UGC  
AGG UUUC UCCUU AUG  
miRNA 3' UA A UGUG U 5'

---

dataset: 1  
target:  
ENSG00000035403|ENSG00000035403.17|ENST00000211998|ENST00000211998.9|74118170  
|74120160|VCL  
length: 1991  
miRNA : hsa-miR-142-3p  
length: 23

mfe: -16.3 kcal/mol  
p-value: 1.000000e+00

position 816  
target 5' C AGCC UGU C C 3'  
AGAGU AGGG GGC CUGC  
UUUCA UCCU UUG GAUG  
miRNA 3' AGGUA U U 5'

---

dataset: 1  
target:  
ENSG00000035403|ENSG00000035403.17|ENST00000211998|ENST00000211998.9|74118170  
|74120160|VCL  
length: 1991  
miRNA : hsa-miR-142-3p  
length: 23

mfe: -16.3 kcal/mol  
p-value: 1.000000e+00

position 1380  
target 5' U UUUUU CUUUA U 3'  
UCC GGUA UACUGC  
AGG UCAU GUGAUG  
miRNA 3' UAUU CCUUU U 5'

---

dataset: 1  
target:  
ENSG00000035403|ENSG00000035403.17|ENST00000211998|ENST00000211998.9|74118170  
|74120160|VCL  
length: 1991  
miRNA : hsa-miR-142-3p  
length: 23

mfe: -16.1 kcal/mol  
p-value: 1.000000e+00

position 1540  
target 5' A U U UCCUUU G 3'  
CU AAGU GG ACACU CA  
GG UUCA CC UGUGA GU  
miRNA 3' A UAU U UU U 5'

---

Version: RNAhybrid 2.2  
Command line: /vol/bioapps/bin/RNAhybrid.bin -t  
/var/bibiserv2/anonymous/rnahybrid/06/01/35/bibiserv2\_2019-10-  
06\_013541\_IeL2B/rnahybrid\_input\_target\_rna\_sequences\_.file -m 1754 -n 23 -s  
3utr\_human -q /var/bibiserv2/anonymous/rnahybrid/06/01/35/bibiserv2\_2019-10-  
06\_013541\_IeL2B/rnahybrid\_input\_mirna\_sequences.file -b 20  
searching  
dataset: 1  
mde of hsa-miR-142-3p: -43.499996  
Individual hits

---

dataset: 1  
target:  
ENSG00000153071|ENSG00000153071.15|ENST00000320816|ENST00000320816.11|DAB2  
length: 1754  
miRNA : hsa-miR-142-3p  
length: 23

mfe: -21.6 kcal/mol  
p-value: 1.000000e+00

position 897  
target 5' U UGUG C C 3'  
UCC GAAG AGGAGG CACU  
AGG UUUC UCCUUU GUGA  
miRNA 3' UA A UGU 5'

---

dataset: 1  
target:  
ENSG00000153071|ENSG00000153071.15|ENST00000320816|ENST00000320816.11|DAB2  
length: 1754  
miRNA : hsa-miR-142-3p  
length: 23

mfe: -21.5 kcal/mol  
p-value: 1.000000e+00

position 505  
target 5' U AAAUU A A 3'  
UUC UAAAGUA GAAGC ACUACA  
AGG AUUUCAU CUUUG UGAUGU  
miRNA 3' U C 5'

---

dataset: 1  
target:  
ENSG00000153071|ENSG00000153071.15|ENST00000320816|ENST00000320816.11|DAB2  
length: 1754  
miRNA : hsa-miR-142-3p  
length: 23

mfe: -19.9 kcal/mol  
p-value: 1.000000e+00

position 322  
target 5' C UCU U A C 3'  
CC GG UGGGAGAUGC GC  
GG UC AUCCUUUGUG UG  
miRNA 3' A UAUU A U 5'

---

dataset: 1  
target:  
ENSG00000153071|ENSG00000153071.15|ENST00000320816|ENST00000320816.11|DAB2  
length: 1754  
miRNA : hsa-miR-142-3p  
length: 23

mfe: -18.5 kcal/mol  
p-value: 1.000000e+00

position 1119  
target 5' G U A 3'  
UCGU AGUAGGAAG  
GGUA UCAUCCUUU  
miRNA 3' A UU GUGAUGU 5'

---

dataset: 1  
target:  
ENSG00000153071|ENSG00000153071.15|ENST00000320816|ENST00000320816.11|DAB2  
length: 1754  
miRNA : hsa-miR-142-3p  
length: 23

mfe: -17.9 kcal/mol  
p-value: 1.000000e+00

position 1387  
target 5' A U AGAAGAGGGU G 3'  
CC UGAGG GGGA GAUGCU CA  
GG AUUUC UCCU UUGUGA GU  
miRNA 3' A U A U 5'

---

dataset: 1  
target:  
ENSG00000153071|ENSG00000153071.15|ENST00000320816|ENST00000320816.11|DAB2  
length: 1754  
miRNA : hsa-miR-142-3p  
length: 23

mfe: -17.2 kcal/mol  
p-value: 1.000000e+00

position 1133  
target 5' G AG AAAA U 3'  
AUAAG GGGAGA GCUG  
UAUUU UCCUUU UGAU  
miRNA 3' AGG CA G GU 5'

dataset: 1  
target:  
ENSG00000153071|ENSG00000153071.15|ENST00000320816|ENST00000320816.11|DAB2  
length: 1754  
miRNA : hsa-miR-142-3p  
length: 23

mfe: -16.6 kcal/mol  
p-value: 1.000000e+00

position 656  
target 5' G UGCAAU A AG U 3'  
CUAU G GGG AACAUUU  
GGUA C UCCU UUGUGAUG  
miRNA 3' A UUU A U 5'

dataset: 1  
target:  
ENSG00000153071|ENSG00000153071.15|ENST00000320816|ENST00000320816.11|DAB2  
length: 1754  
miRNA : hsa-miR-142-3p  
length: 23

mfe: -16.6 kcal/mol  
p-value: 1.000000e+00

position 1353  
target 5' U U UUAUCA C U 3'  
UCU GUGGGAG GC ACA  
AGG CAUCCUU UG UGU  
miRNA 3' UAUUU UG A 5'

dataset: 1  
target:  
ENSG00000153071|ENSG00000153071.15|ENST00000320816|ENST00000320816.11|DAB2



length: 1754  
miRNA : hsa-miR-142-3p  
length: 23

mfe: -16.4 kcal/mol  
p-value: 1.000000e+00

position 1730  
target 5' U A CU UG A 3'  
UC AUAUUU GGAG GC  
AG UAUUUU CCUU UG  
miRNA 3' G CAU UG AUGU 5'

---

dataset: 1  
target:  
ENSG00000153071|ENSG00000153071.15|ENST00000320816|ENST00000320816.11|DAB2  
length: 1754  
miRNA : hsa-miR-142-3p  
length: 23

mfe: -16.2 kcal/mol  
p-value: 1.000000e+00

position 1041  
target 5' A U GCUUAAUUUG UC G 3'  
CAU AGGU GGG AUGCUA  
GUA UUCA UCC UGUGAU  
miRNA 3' AG U UU GU 5'

---

dataset: 1  
target:  
ENSG00000153071|ENSG00000153071.15|ENST00000320816|ENST00000320816.11|DAB2  
length: 1754  
miRNA : hsa-miR-142-3p  
length: 23

mfe: -16.1 kcal/mol  
p-value: 1.000000e+00

position 21  
target 5' A CC U 3'  
CCAU AG AGGAA  
GGUA UC UCCUU  
miRNA 3' A UU A UGUGAUGU 5'

---

dataset: 1  
target:  
ENSG00000153071|ENSG00000153071.15|ENST00000320816|ENST00000320816.11|DAB2  
length: 1754  
miRNA : hsa-miR-142-3p  
length: 23

mfe: -15.9 kcal/mol  
p-value: 1.000000e+00

position 1073  
target 5' C C ACU ACUUUUC G 3'  
UUUUAU AAGUA GGAAA UUGCA  
AGGUA UUCAU CCUUU GAUGU  
miRNA 3' U GU 5'

---

dataset: 1  
target:  
ENSG00000153071|ENSG00000153071.15|ENST00000320816|ENST00000320816.11|DAB2  
length: 1754  
miRNA : hsa-miR-142-3p  
length: 23

mfe: -15.7 kcal/mol  
p-value: 1.000000e+00

position 1207  
target 5' C UCACAACUU U 3'  
UCC GGAAACG  
AGG CCUUUGU  
miRNA 3' UAUUUCAU GAUGU 5'

---

dataset: 1  
target:  
ENSG00000153071|ENSG00000153071.15|ENST00000320816|ENST00000320816.11|DAB2  
length: 1754  
miRNA : hsa-miR-142-3p  
length: 23

mfe: -15.7 kcal/mol  
p-value: 1.000000e+00

position 1548  
target 5' A ACAC ACUU G U 3'  
CUAUAA AG GAAUA UAC  
GGUAUU UC CUUUGU AUG  
miRNA 3' A AUC G U 5'

---

dataset: 1  
target:  
ENSG00000153071|ENSG00000153071.15|ENST00000320816|ENST00000320816.11|DAB2  
length: 1754  
miRNA : hsa-miR-142-3p  
length: 23

mfe: -15.4 kcal/mol  
p-value: 1.000000e+00

position 1582  
target 5' G AAUACCUAAAUGUGC CU GG A U 3'  
UCCA UAAA GGA U ACUUAU  
AGGU AUUU CCU G UGAUG  
miRNA 3' CAU UU U 5'

---

dataset: 1  
target:  
ENSG00000153071|ENSG00000153071.15|ENST00000320816|ENST00000320816.11|DAB2  
length: 1754  
miRNA : hsa-miR-142-3p  
length: 23

mfe: -15.3 kcal/mol  
p-value: 1.000000e+00

position 46  
target 5' G UU UCAA AA U 3'  
CC AGUAG AAACA GC  
GG UCAUC UUUGU UG  
miRNA 3' A UAUU C GA U 5'

---

dataset: 1  
target:  
ENSG00000153071|ENSG00000153071.15|ENST00000320816|ENST00000320816.11|DAB2  
length: 1754  
miRNA : hsa-miR-142-3p  
length: 23

mfe: -14.8 kcal/mol  
p-value: 1.000000e+00

position 427  
target 5' G AACCUAAAGGUUUAU AACAC C 3'  
CAUAA AGUAG AGGCAC  
GUAUU UCAUC UUUGUG  
miRNA 3' AG C AUGU 5'

---

dataset: 1  
target:  
ENSG00000153071|ENSG00000153071.15|ENST00000320816|ENST00000320816.11|DAB2  
length: 1754  
miRNA : hsa-miR-142-3p  
length: 23

mfe: -14.8 kcal/mol  
p-value: 1.000000e+00

position 1244  
target 5' G UGUU GCAC UCUGA UU U 3'  
UCC GUGA AGU AGGG UAUUUAU  
AGG UAUU UCA UCCU GUGAUG  
miRNA 3' UU U 5'

dataset: 1  
target:  
ENSG00000153071|ENSG00000153071.15|ENST00000320816|ENST00000320816.11|DAB2  
length: 1754  
miRNA : hsa-miR-142-3p  
length: 23

mfe: -14.7 kcal/mol  
p-value: 1.000000e+00

position 396  
target 5' G UGUUUU UU UG UU G 3'  
UUCA GAGU GGGG C U CA  
AGGU UUCA UCCU G A GU  
miRNA 3' AU UU UG U 5'

dataset: 1  
target:  
ENSG00000153071|ENSG00000153071.15|ENST00000320816|ENST00000320816.11|DAB2  
length: 1754  
miRNA : hsa-miR-142-3p  
length: 23

mfe: -14.6 kcal/mol  
p-value: 1.000000e+00

position 858  
target 5' C A C A A 3'  
CCA GAA UAG AUUGCA  
GGU UUU AUC UGAUGU  
miRNA 3' A A C CUUUG 5'

Version: RNAhybrid 2.2  
Command line:/vol/bioapps/bin/RNAhybrid.bin -n 23 -s 3utr\_human -t  
/var/bibiserv2/anonymous/rnahybrid/06/01/18/bibiserv2\_2019-10-  
06\_011856\_y4Dx7/rnahybrid\_input\_target\_rna\_sequences\_.file -b 20 -m 2598 -q  
/var/bibiserv2/anonymous/rnahybrid/06/01/18/bibiserv2\_2019-10-  
06\_011856\_y4Dx7/rnahybrid\_input\_mirna\_sequences.file  
searching  
dataset: 1  
mde of hsa-miR-142-3p: -43.499996  
Individual hits

---

dataset: 1  
target:  
ENSG00000005020|ENSG00000005020.13|ENST00000345317|ENST00000345317.7|SKAP2  
length: 2598  
miRNA : hsa-miR-142-3p  
length: 23

mfe: -23.0 kcal/mol  
p-value: 1.000000e+00

position 2148  
target 5' A A 3'  
UAU AGGUGGGAGACAU  
GUA UUCAUCCUUUGUG  
miRNA 3' AG U AUGU 5'

---

dataset: 1  
target:  
ENSG00000005020|ENSG00000005020.13|ENST00000345317|ENST00000345317.7|SKAP2  
length: 2598  
miRNA : hsa-miR-142-3p  
length: 23

mfe: -20.1 kcal/mol  
p-value: 1.000000e+00

position 905  
target 5' C C G G 3'  
AAGGUAGG AGA GUUGCA  
UUUCAUCC UUU UGAUGU  
miRNA 3' AGGUA G 5'

---

dataset: 1  
target:  
ENSG00000005020|ENSG00000005020.13|ENST00000345317|ENST00000345317.7|SKAP2  
length: 2598  
miRNA : hsa-miR-142-3p  
length: 23

mfe: -19.0 kcal/mol  
p-value: 1.000000e+00

position 865  
target 5' C GCUACU CAAG C 3'  
CCA UGGGAGGC GCA  
GGU AUCCUUUG UGU  
miRNA 3' A AUUUC UGA 5'

---

dataset: 1  
target:  
ENSG00000005020|ENSG00000005020.13|ENST00000345317|ENST00000345317.7|SKAP2  
length: 2598  
miRNA : hsa-miR-142-3p  
length: 23

mfe: -19.0 kcal/mol  
p-value: 1.000000e+00

position 1969  
target 5' C U G U G 3'  
CCAUGA GGAAA CA CUA  
GGUAUU CCUUU GU GAU  
miRNA 3' A UCAU GU 5'

---

dataset: 1  
target:  
ENSG00000005020|ENSG00000005020.13|ENST00000345317|ENST00000345317.7|SKAP2  
length: 2598  
miRNA : hsa-miR-142-3p  
length: 23

mfe: -18.5 kcal/mol  
p-value: 1.000000e+00

position 3  
target 5' G AA AUUCUU U 3'  
UCC UGGA AGGAAA CUGC  
AGG AUUU UCCUUU GAUG  
miRNA 3' U CA GU U 5'

---

dataset: 1  
target:  
ENSG00000005020|ENSG00000005020.13|ENST00000345317|ENST00000345317.7|SKAP2  
length: 2598  
miRNA : hsa-miR-142-3p  
length: 23

mfe: -18.5 kcal/mol  
p-value: 1.000000e+00

position 2013  
target 5' A A UCCU C 3'

```
          UCCA GGAG GGGAG    UUGC
          AGGU UUUC UCCUU    GAUG
miRNA  3'      A      A      UGU      U 5'
```

-----  
dataset: 1  
target:  
ENSG00000005020|ENSG00000005020.13|ENST00000345317|ENST00000345317.7|SKAP2  
length: 2598  
miRNA : hsa-miR-142-3p  
length: 23

mfe: -17.8 kcal/mol  
p-value: 1.000000e+00

position 633  
target 5' A U CU A 3'  
 CCA GAAGUA GA CA UGCA  
 GGU UUUCAU CU GU AUGU  
miRNA 3' A A C UU G 5'

-----  
dataset: 1  
target:  
ENSG00000005020|ENSG00000005020.13|ENST00000345317|ENST00000345317.7|SKAP2  
length: 2598  
miRNA : hsa-miR-142-3p  
length: 23

mfe: -17.5 kcal/mol  
p-value: 1.000000e+00

position 1644  
target 5' G A U 3'  
 UUUUAU UAG GAGACAUUG  
 AGGUAU AUC CUUUGUGAU  
miRNA 3' UUC GU 5'

-----  
dataset: 1  
target:  
ENSG00000005020|ENSG00000005020.13|ENST00000345317|ENST00000345317.7|SKAP2  
length: 2598  
miRNA : hsa-miR-142-3p  
length: 23

mfe: -17.2 kcal/mol  
p-value: 1.000000e+00

position 314  
target 5' A CA U U 3'  
 CUAUAG UAG AUGCUAC  
 GGUAUU AUC UGUGAUG  
miRNA 3' A UC CUU U 5'

---

dataset: 1  
target:  
ENSG00000005020|ENSG00000005020.13|ENST00000345317|ENST00000345317.7|SKAP2  
length: 2598  
miRNA : hsa-miR-142-3p  
length: 23  
  
mfe: -17.2 kcal/mol  
p-value: 1.000000e+00

position 434  
target 5' A C UUUUUUU U A 3'  
UCAUG GAGU GG AGAUGCUG  
GGUAU UUCA CC UUUGUGAU  
miRNA 3' A U GU 5'

---

dataset: 1  
target:  
ENSG00000005020|ENSG00000005020.13|ENST00000345317|ENST00000345317.7|SKAP2  
length: 2598  
miRNA : hsa-miR-142-3p  
length: 23  
  
mfe: -17.2 kcal/mol  
p-value: 1.000000e+00

position 1207  
target 5' A U UUAGCCU UG G 3'  
AAGGUAG G GACAUU A  
UUUCAUC C UUGUGA U  
miRNA 3' AGGUA U UG 5'

---

dataset: 1  
target:  
ENSG00000005020|ENSG00000005020.13|ENST00000345317|ENST00000345317.7|SKAP2  
length: 2598  
miRNA : hsa-miR-142-3p  
length: 23  
  
mfe: -17.2 kcal/mol  
p-value: 1.000000e+00

position 2269  
target 5' A GGG UUUCUUU CCUUG A 3'  
CCA AGAGU ACAC ACA  
GGU UUUCA UGUG UGU  
miRNA 3' A A UCCUU A 5'

---



dataset: 1  
target:  
ENSG00000005020|ENSG00000005020.13|ENST00000345317|ENST00000345317.7|SKAP2  
length: 2598  
miRNA : hsa-miR-142-3p  
length: 23  
  
mfe: -17.1 kcal/mol  
p-value: 1.000000e+00

position 837  
target 5' G U UAAUGUU C G 3'  
CCA AGUG GG CAC UGCA  
GGU UCAU CC GUG AUGU  
miRNA 3' A AUU UUU 5'

dataset: 1  
target:  
ENSG00000005020|ENSG00000005020.13|ENST00000345317|ENST00000345317.7|SKAP2  
length: 2598  
miRNA : hsa-miR-142-3p  
length: 23  
  
mfe: -16.9 kcal/mol  
p-value: 1.000000e+00

position 2190  
target 5' C GAC CAAAUAAU U 3'  
UGGAGU AGGA CAUUAC  
AUUUCA UCCU GUGAUG  
miRNA 3' AGGU UU U 5'

dataset: 1  
target:  
ENSG00000005020|ENSG00000005020.13|ENST00000345317|ENST00000345317.7|SKAP2  
length: 2598  
miRNA : hsa-miR-142-3p  
length: 23  
  
mfe: -16.7 kcal/mol  
p-value: 1.000000e+00

position 1891  
target 5' G GCC UG A G 3'  
UCC UAG AGUAG A GC GCA  
AGG AUU UCAUC U UG UGU  
miRNA 3' U CU UG A 5'

dataset: 1  
target:  
ENSG00000005020|ENSG00000005020.13|ENST00000345317|ENST00000345317.7|SKAP2

length: 2598  
miRNA : hsa-miR-142-3p  
length: 23

mfe: -16.6 kcal/mol  
p-value: 1.000000e+00

position 949  
target 5' C GCC C G 3'  
UCCA UGGG GACA  
AGGU AUCC UUGU  
miRNA 3' AUUUC U GAUGU 5'

---

dataset: 1  
target:  
ENSG00000005020|ENSG00000005020.13|ENST00000345317|ENST00000345317.7|SKAP2  
length: 2598  
miRNA : hsa-miR-142-3p  
length: 23

mfe: -16.6 kcal/mol  
p-value: 1.000000e+00

position 1113  
target 5' U UACUUCUCA A 3'  
UCUAUA GAGCACUG  
AGGUAU UUUGUGAU  
miRNA 3' UUCAUCC GU 5'

---

dataset: 1  
target:  
ENSG00000005020|ENSG00000005020.13|ENST00000345317|ENST00000345317.7|SKAP2  
length: 2598  
miRNA : hsa-miR-142-3p  
length: 23

mfe: -16.3 kcal/mol  
p-value: 1.000000e+00

position 1175  
target 5' C GU C UG CA G 3'  
CCA GGUAG A UAC ACA  
GGU UCAUC U GUG UGU  
miRNA 3' A AUU C UU A 5'

---

dataset: 1  
target:  
ENSG00000005020|ENSG00000005020.13|ENST00000345317|ENST00000345317.7|SKAP2  
length: 2598  
miRNA : hsa-miR-142-3p  
length: 23

mfe: -16.3 kcal/mol  
p-value: 1.000000e+00

position 1505  
target 5' C      UAUUU    UA      UG UUAUAA    G 3'  
          UCCAU      GUG AAAC U      GCA  
          AGGUA      CAU UUUG A      UGU  
miRNA 3'      UUU      CC      UG            5'

---

dataset: 1  
target:  
ENSG00000005020|ENSG00000005020.13|ENST00000345317|ENST00000345317.7|SKAP2  
length: 2598  
miRNA : hsa-miR-142-3p  
length: 23

mfe: -16.2 kcal/mol  
p-value: 1.000000e+00

position 1712  
target 5' C      U      CCAUU      AG      A 3'  
          UCAUA AGUG      GAAAU ACUG  
          GGUAU UCAU      CUUUG UGAU  
miRNA 3' A      U      C                    GU 5'

---

Version: RNAhybrid 2.2  
Command line:/vol/bioapps/bin/RNAhybrid.bin -q  
/var/bibiserv2/anonymous/rnahybrid/12/02/36/bibiserv2\_2019-09-  
12\_023652\_kTUHU/rnahybrid\_input\_mirna\_sequences.file -s 3utr\_human -m 9750 -n  
23 -b 20 -t /var/bibiserv2/anonymous/rnahybrid/12/02/36/bibiserv2\_2019-09-  
12\_023652\_kTUHU/rnahybrid\_input\_target\_rna\_sequences\_.file  
searching  
dataset: 1  
mde of hsa-miR-142-3p: -43.499996  
Individual hits

---

dataset: 1  
target:  
ENSG00000100030|ENSG00000100030.14|ENST00000215832|ENST00000215832.10|2176919  
5;21754500|21769203;21764240|MAPK1  
length: 9750  
miRNA : hsa-miR-142-3p  
length: 23  
mfe: -25.9 kcal/mol  
p-value: 1.000000e+00

position 973  
target 5' U           CCU   GAUUUAGCAG   A                   U 3'  
          UCCAUG    GAG                   AG GGAACACUGCG  
          AGGUAU    UUC                   UC CUUUGUGAUGU  
miRNA  3'                   A                                           5'

---

dataset: 1  
target:  
ENSG00000100030|ENSG00000100030.14|ENST00000215832|ENST00000215832.10|2176919  
5;21754500|21769203;21764240|MAPK1  
length: 9750  
miRNA : hsa-miR-142-3p  
length: 23  
mfe: -24.9 kcal/mol  
p-value: 1.000000e+00

position 5363  
target 5' G  GGUG                           AGGUCU   U 3'  
          CA    AAGGUGGGAGACA            CUGC  
          GU    UUUCAUCCUUUGU            GAUG  
miRNA  3' AG  A                                                   U 5'

---

dataset: 1  
target:  
ENSG00000100030|ENSG00000100030.14|ENST00000215832|ENST00000215832.10|2176919  
5;21754500|21769203;21764240|MAPK1  
length: 9750  
miRNA : hsa-miR-142-3p  
length: 23

mfe: -24.5 kcal/mol  
p-value: 1.000000e+00

position 4243  
target 5' G           A           UUUCUUG           UG U 3'  
          UCAUAAAG UAGGA           GACAUU G  
          GGUAUUUC AUCCU           UUGUGA U  
miRNA 3' A                                   UG 5'

---

dataset: 1  
target:  
ENSG00000100030|ENSG00000100030.14|ENST00000215832|ENST00000215832.10|2176919  
5;21754500|21769203;21764240|MAPK1  
length: 9750  
miRNA : hsa-miR-142-3p  
length: 23

mfe: -24.1 kcal/mol  
p-value: 1.000000e+00

position 4475  
target 5' G                           AUA    U 3'  
          CUGUAAAGU GGAAGCA    UUAC  
          GGUAUUUCA CCUUUGU    GAUG  
miRNA 3' A                   U                   U 5'

---

dataset: 1  
target:  
ENSG00000100030|ENSG00000100030.14|ENST00000215832|ENST00000215832.10|2176919  
5;21754500|21769203;21764240|MAPK1  
length: 9750  
miRNA : hsa-miR-142-3p  
length: 23

mfe: -23.7 kcal/mol  
p-value: 1.000000e+00

position 8903  
target 5' C           A           AGG   A 3'  
          CCA   AG AGGGAGCAC   GCA  
          GGU   UC UCCUUUGUG   UGU  
miRNA 3' A   AUU   A           A           5'

---

dataset: 1  
target:  
ENSG00000100030|ENSG00000100030.14|ENST00000215832|ENST00000215832.10|2176919  
5;21754500|21769203;21764240|MAPK1  
length: 9750  
miRNA : hsa-miR-142-3p  
length: 23

mfe: -23.6 kcal/mol  
p-value: 1.000000e+00

position 416  
target 5' C G U 3'  
UUUAUGA UAGGGAA GCUAC  
AGGUAUU AUCCUUU UGAUG  
miRNA 3' UC G U 5'

---

dataset: 1  
target:  
ENSG00000100030|ENSG00000100030.14|ENST00000215832|ENST00000215832.10|2176919  
5;21754500|21769203;21764240|MAPK1  
length: 9750  
miRNA : hsa-miR-142-3p  
length: 23

mfe: -23.6 kcal/mol  
p-value: 1.000000e+00

position 5025  
target 5' A CU GGAAC C 3'  
CCAU GAGG AGGAAACAC  
GGUA UUUC UCCUUUGUG  
miRNA 3' A A AUGU 5'

---

dataset: 1  
target:  
ENSG00000100030|ENSG00000100030.14|ENST00000215832|ENST00000215832.10|2176919  
5;21754500|21769203;21764240|MAPK1  
length: 9750  
miRNA : hsa-miR-142-3p  
length: 23

mfe: -23.5 kcal/mol  
p-value: 1.000000e+00

position 740  
target 5' A U UGU UGU A 3'  
CCAUA AG AGG AACACU CA  
GGUAU UC UCC UUGUGA GU  
miRNA 3' A U A U U 5'

---

dataset: 1  
target:  
ENSG00000100030|ENSG00000100030.14|ENST00000215832|ENST00000215832.10|2176919  
5;21754500|21769203;21764240|MAPK1  
length: 9750  
miRNA : hsa-miR-142-3p  
length: 23

mfe: -23.4 kcal/mol  
p-value: 1.000000e+00

position 7802  
target 5' A UU CCACU G 3'  
CCAUA GUG GCACUGCA  
GGUAUU CAU UGUGAUGU  
miRNA 3' A U CCUU 5'

---

dataset: 1  
target:  
ENSG00000100030|ENSG00000100030.14|ENST00000215832|ENST00000215832.10|2176919  
5;21754500|21769203;21764240|MAPK1  
length: 9750  
miRNA : hsa-miR-142-3p  
length: 23

mfe: -23.1 kcal/mol  
p-value: 1.000000e+00

position 9502  
target 5' C GUGUUG GGGGCCUGAU GG C 3'  
CCA GAGGU GGGU UGCUAC  
GGU UUUCA UCCU GUGAUG  
miRNA 3' A A UU U 5'

---

dataset: 1  
target:  
ENSG00000100030|ENSG00000100030.14|ENST00000215832|ENST00000215832.10|2176919  
5;21754500|21769203;21764240|MAPK1  
length: 9750  
miRNA : hsa-miR-142-3p  
length: 23

mfe: -22.9 kcal/mol  
p-value: 1.000000e+00

position 7459  
target 5' A CUACACAA G G A 3'  
CCAU GGAG AGGAA GCACUA  
GGUA UUUC UCCUU UGUGAU  
miRNA 3' A A GU 5'

---

dataset: 1  
target:  
ENSG00000100030|ENSG00000100030.14|ENST00000215832|ENST00000215832.10|2176919  
5;21754500|21769203;21764240|MAPK1  
length: 9750  
miRNA : hsa-miR-142-3p  
length: 23

mfe: -22.6 kcal/mol  
p-value: 1.000000e+00

position 567  
target 5' C GAAUCCU U 3'  
UCCG UGGGGAGCACU  
AGGU AUCCUUUGUGA  
miRNA 3' AUUUC UGU 5'

---

dataset: 1  
target:  
ENSG00000100030|ENSG00000100030.14|ENST00000215832|ENST00000215832.10|2176919  
5;21754500|21769203;21764240|MAPK1  
length: 9750  
miRNA : hsa-miR-142-3p  
length: 23

mfe: -22.5 kcal/mol  
p-value: 1.000000e+00

position 5546  
target 5' A U ACC G 3'  
CCA GGUGGGA GCA ACA  
GGU UCAUCCU UGU UGU  
miRNA 3' A AUU U GA 5'

---

dataset: 1  
target:  
ENSG00000100030|ENSG00000100030.14|ENST00000215832|ENST00000215832.10|2176919  
5;21754500|21769203;21764240|MAPK1  
length: 9750  
miRNA : hsa-miR-142-3p  
length: 23

mfe: -22.5 kcal/mol  
p-value: 1.000000e+00

position 3077  
target 5' G UC UG U 3'  
CCAU AG AGGAAAC U  
GGUA UC UCCUUUG A  
miRNA 3' A UU A UG UGU 5'

---



dataset: 1  
target:  
ENSG00000100030|ENSG00000100030.14|ENST00000215832|ENST00000215832.10|2176919  
5;21754500|21769203;21764240|MAPK1  
length: 9750  
miRNA : hsa-miR-142-3p  
length: 23

mfe: -22.1 kcal/mol  
p-value: 1.000000e+00

position 9403  
target 5' A U C C 3'  
CC GGGUGGGG AGCA UGCA  
GG UUCAUCCU UUGU AUGU  
miRNA 3' A UAU G 5'

---

dataset: 1  
target:  
ENSG00000100030|ENSG00000100030.14|ENST00000215832|ENST00000215832.10|2176919  
5;21754500|21769203;21764240|MAPK1  
length: 9750  
miRNA : hsa-miR-142-3p  
length: 23

mfe: -22.0 kcal/mol  
p-value: 1.000000e+00

position 5411  
target 5' A A UGUAUU C 3'  
CCGUGAA GU AGGAGG ACUGC  
GGUAUUU CA UCCUUU UGAUG  
miRNA 3' A G U 5'

---

dataset: 1  
target:  
ENSG00000100030|ENSG00000100030.14|ENST00000215832|ENST00000215832.10|2176919  
5;21754500|21769203;21764240|MAPK1  
length: 9750  
miRNA : hsa-miR-142-3p  
length: 23

mfe: -21.9 kcal/mol  
p-value: 1.000000e+00

position 8613  
target 5' A CG GC G 3'  
CC GGAG GGAGG UUGCA  
GG UUUC CCUUU GAUGU  
miRNA 3' A UA AU GU 5'

---

dataset: 1  
target:  
ENSG00000100030|ENSG00000100030.14|ENST00000215832|ENST00000215832.10|2176919  
5;21754500|21769203;21764240|MAPK1  
length: 9750  
miRNA : hsa-miR-142-3p  
length: 23

mfe: -21.9 kcal/mol  
p-value: 1.000000e+00

position 677  
target 5' U AA A C 3'  
UCU AUAAA AGGAAGUACUGCA  
AGG UAUUU UCCUUUGUGAUGU  
miRNA 3' CA 5'

---

dataset: 1  
target:  
ENSG00000100030|ENSG00000100030.14|ENST00000215832|ENST00000215832.10|2176919  
5;21754500|21769203;21764240|MAPK1  
length: 9750  
miRNA : hsa-miR-142-3p  
length: 23

mfe: -21.7 kcal/mol  
p-value: 1.000000e+00

position 5929  
target 5' A UC U A 3'  
UCCAU AGUAG CACUG  
AGGUA UCAUC GUGAU  
miRNA 3' UU CUUU GU 5'

---

dataset: 1  
target:  
ENSG00000100030|ENSG00000100030.14|ENST00000215832|ENST00000215832.10|2176919  
5;21754500|21769203;21764240|MAPK1  
length: 9750  
miRNA : hsa-miR-142-3p  
length: 23

mfe: -21.7 kcal/mol  
p-value: 1.000000e+00

position 7074  
target 5' G CAG UCCU G 3'  
GUGAAG GGGAGGC CUAU  
UAUUUC UCCUUUG GAUG  
miRNA 3' AGG A U U 5'

---
